# Supplementary material
Source: MDPI journal article supplement (https://www.mdpi.com/search?q=molecules-24-01744)
Supplement: s001 [file molecules-24-01744-s001.pdf]

# Supplemental Materials

The Bio-Safety Concerns of Temporary Hair Dye Molecules:

Percutaneous Absorption, Cytotoxicity, BSA and DNA Interaction

Research

**Bing Liu<sup>1,2</sup>, Shu-fang Jin<sup>3</sup>, Hua-Chao Li<sup>1,2</sup>, Xiang-Yu Sun<sup>3</sup>, Si-Qi Yan<sup>3</sup>, Shu-Jun Deng<sup>3</sup> and Ping Zhao<sup>3,\*</sup>,**

<sup>1</sup> Guangzhou key laboratory of construction and application of new drug screening model systems, Guangdong Pharmaceutical University, Guangzhou 510006, China; liubing520@gdpu.edu.cn (B. Liu)

<sup>2</sup> Key Laboratory of New Drug Discovery and Evaluation of ordinary universities of Guangdong province, Guangdong Pharmaceutical University, Guangzhou 510006, China

<sup>3</sup> School of Chemistry and Chemical Engineering, Guangdong Pharmaceutical University, No. 280, Waihuandong Road, Education Mega Centre, Guangzhou 510006, PR China

\* Correspondence: pingzhao@gdpu.edu.cn (P. Zhao).

## **Captions**

Fig. S1: The emission spectra of BSA under different concentrations of (a) BR2 and (b) VBB. The arrows indicate the spectra change with the addition of concentration.

Fig. S2: The H-bonds between BSA and dyes, (a) FB, (b) BR2 and (c) VBB based on the lowest free binding energy.

Fig. S3: The binding details between CT-DNA and dyes, (a) FB, (b) BR2 and (c) VBB based on the lowest free binding energy.

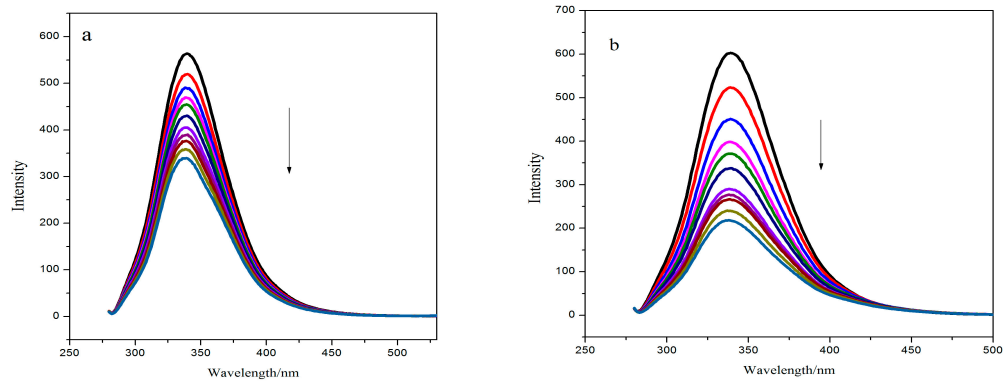

Fig. S1: The emission spectra of BSA under different concentrations of BR2 (a) and VBB (b). The arrows indicate the spectra change with the addition of concentration.

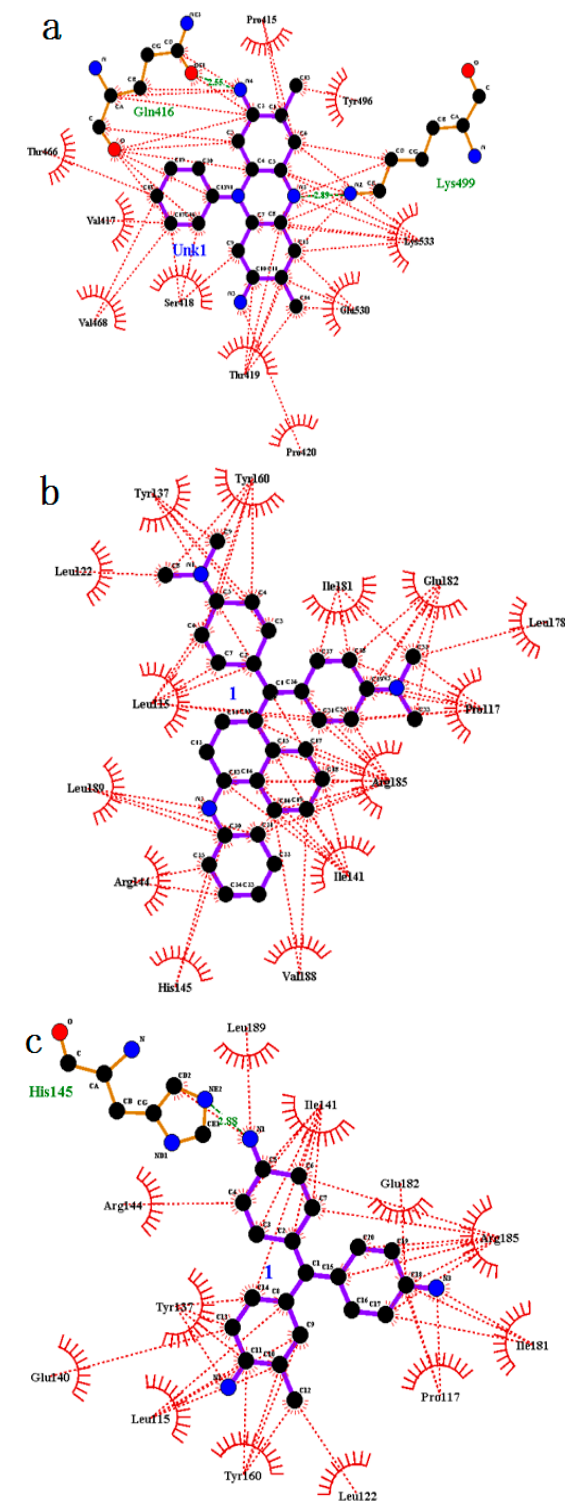

Fig. S2: The H-bonds between BSA and dyes, (a) FB, (b) BR2 and (c) VBB based on the lowest free binding energy.

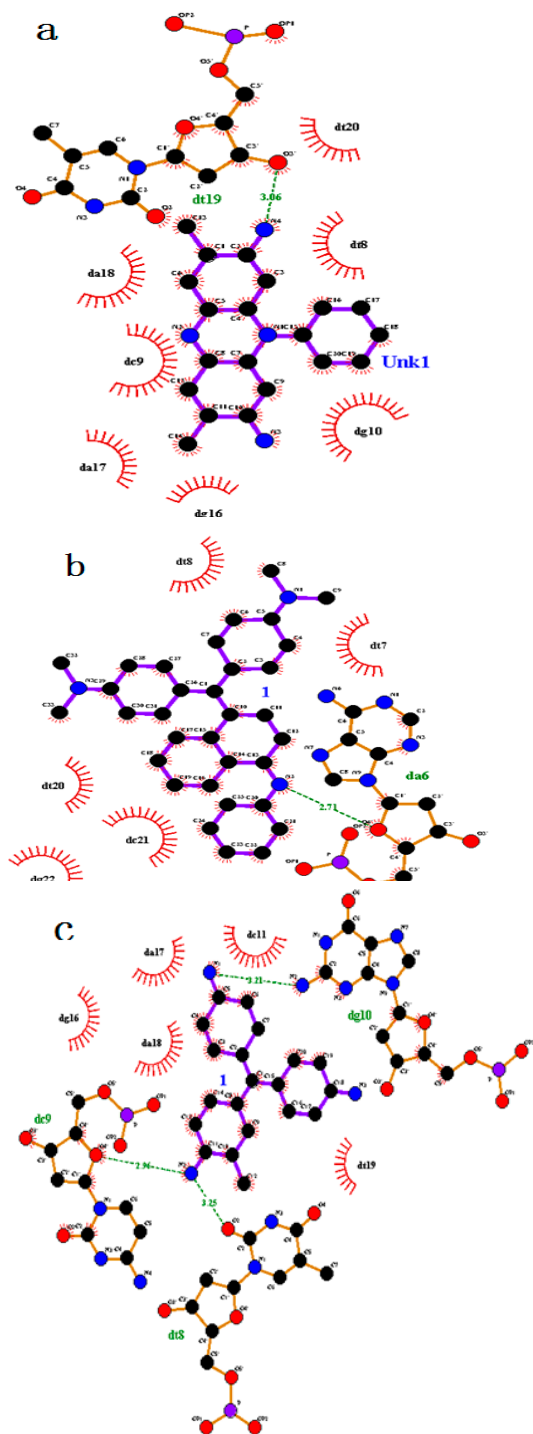

Fig. S3. The binding details between CT-DNA and dyes, (a) FB, (b) BR2 and (c) VBB based on the lowest free binding energy.
